# Supplementary material for: The impact of primary total hip and knee replacement on frailty: an observational prospective analysis
Source: PubMed Central journal article supplement (PMC10799496; doi:10.1186/s12891-024-07210-w), 2024-01-20
Supplement: 12891_2024_7210_MOESM1_ESM.pdf [file 12891_2024_7210_MOESM1_ESM.pdf]

## Additional file 1

### Supplementary file contents:

These further analyses included repeated measures ANOVA as well as post-hoc tests for the subgroups of the total sample, pre-frail (score 1-2) and frail patients (score  $\geq 3$ ), and for each of the five subdomains (weight loss, exhaustion, slowness, weakness, low physical activity) of the Fried Frailty Phenotype as an outcome variable.

**Supplementary Table 1** rmANOVA Subscore Weight loss

| <b>Total sample</b> |                 |            |          |            |                |
|---------------------|-----------------|------------|----------|------------|----------------|
| <b>Effect</b>       | <b>df</b>       | <b>MSE</b> | <b>F</b> | <b>ges</b> | <b>p.value</b> |
| Time                | 2.62,<br>253.69 | 0.06       | 44652    | .006       | .371           |
| <b>Pre-frail</b>    |                 |            |          |            |                |
| <b>Effect</b>       | <b>df</b>       | <b>MSE</b> | <b>F</b> | <b>ges</b> | <b>p.value</b> |
| Time                | 2.29,<br>109,68 | 0.03       | 0.73     | 0.12       | 0.502          |
| <b>Frail</b>        |                 |            |          |            |                |
| <b>Effect</b>       | <b>df</b>       | <b>MSE</b> | <b>F</b> | <b>ges</b> | <b>p.value</b> |
| Time                | 2.51,<br>120.56 | 0.08       | 2.55     | .030       | .069           |

**Supplementary Table 2** rmANOVA Subscore Exhaustion

| <b>Total sample</b>                               |                 |            |           |                |                |
|---------------------------------------------------|-----------------|------------|-----------|----------------|----------------|
| <b>Effect</b>                                     | <b>df</b>       | <b>MSE</b> | <b>F</b>  | <b>ges</b>     | <b>p.value</b> |
| Time                                              | 2.72,<br>264.13 | 0.16       | 49.40     | .223           | <.001          |
| <b>contrast</b>                                   | <b>estimate</b> | <b>SE</b>  | <b>df</b> | <b>t.ratio</b> | <b>p.value</b> |
| pre-op (t0) - d7 post-op (t1)                     | 0.337           | 0.0648     | 97        | 5198           | <.001          |
| pre-op (t0) - 4-6 wk post-op (t2)                 | 0.490           | 0.0547     | 97        | 8947           | <.001          |
| pre-op (t0) - 12 wk post-op (t3)                  | 0.633           | 0.0511     | 97        | 12392          | <.001          |
| d7 post-op (t1) - 4-6 wk post-op (t2)             | 0.153           | 0.0510     | 97        | 3002           | <b>0.020</b>   |
| d7 post-op (t1) - 12 wk post-op (t3)              | 0.296           | 0.0566     | 97        | 5231           | <.001          |
| 4-6 wk post-op (t2) - 12 wk post-op (t3)          | 0.143           | 0.0481     | 97        | 2970           | <b>0.023</b>   |
| P value adjustment: bonferroni method for 6 tests |                 |            |           |                |                |
| <b>Pre-frail</b>                                  |                 |            |           |                |                |
| <b>Effect</b>                                     | <b>df</b>       | <b>MSE</b> | <b>F</b>  | <b>ges</b>     | <b>p.value</b> |
| Time                                              | 2.47,<br>118.49 | 0.19       | 22.41     | .230           | <.001          |
| <b>contrast</b>                                   | <b>estimate</b> | <b>SE</b>  | <b>df</b> | <b>t.ratio</b> | <b>p.value</b> |
| pre-op (t0) - d7 post-op (t1)                     | 0.1837          | 0.0996     | 48        | 1844           | 0.429          |
| pre-op (t0) - 4-6 wk post-op (t2)                 | 0.4898          | 0.0778     | 48        | 6294           | <.001          |
| pre-op (t0) - 12 wk post-op (t3)                  | 0.5714          | 0.0714     | 48        | 8000           | <.001          |
| d7 post-op (t1) - 4-6 wk post-op (t2)             | 0.3061          | 0.0726     | 48        | 4215           | <.001          |
| d7 post-op (t1) - 12 wk post-op (t3)              | 0.3878          | 0.0866     | 48        | 4478           | <.001          |
| 4-6 wk post-op (t2) - 12 wk post-op (t3)          | 0.0816          | 0.0641     | 48        | 1273           | 0.212          |
| P value adjustment: bonferroni method for 6 tests |                 |            |           |                |                |
| <b>Frail</b>                                      |                 |            |           |                |                |
| <b>Effect</b>                                     | <b>df</b>       | <b>MSE</b> | <b>F</b>  | <b>ges</b>     | <b>p.value</b> |
| Time                                              | 2.89,<br>138.73 | 0.13       | 32.84     | .263           | <.001          |
| <b>contrast</b>                                   | <b>estimate</b> | <b>SE</b>  | <b>df</b> | <b>t.ratio</b> | <b>p.value</b> |
| pre-op (t0) - d7 post-op (t1)                     | 0.490           | 0.0778     | 48        | 6.294          | <.001          |
| pre-op (t0) - 4-6 wk post-op (t2)                 | 0.490           | 0.0778     | 48        | 6.294          | <.001          |
| pre-op (t0) - 12 wk post-op (t3)                  | 0.694           | 0.0726     | 48        | 9.553          | <.001          |
| d7 post-op (t1) - 4-6 wk post-op (t2)             | 0.000           | 0.0652     | 48        | 0.000          | 1.000          |
| d7 post-op (t1) - 12 wk post-op (t3)              | 0.204           | 0.0713     | 48        | 2.862          | <b>0.037</b>   |
| 4-6 wk post-op (t2) - 12 wk post-op (t3)          | 0.204           | 0.0713     | 48        | 2.862          | <b>0.037</b>   |
| P value adjustment: bonferroni method for 6 tests |                 |            |           |                |                |

**Supplementary Table 3** rmANOVA Subscore Slowed walking speed

| <b>Total sample</b>                               |                 |            |           |                |                |
|---------------------------------------------------|-----------------|------------|-----------|----------------|----------------|
| <b>Effect</b>                                     | <b>df</b>       | <b>MSE</b> | <b>F</b>  | <b>ges</b>     | <b>p.value</b> |
| Time                                              | 2.84,<br>275.56 | 0.15       | 33.09     | .140           | <.001          |
| <b>contrast</b>                                   | <b>estimate</b> | <b>SE</b>  | <b>df</b> | <b>t.ratio</b> | <b>p.value</b> |
| pre-op (t0) - d7 post-op (t1)                     | -0.173          | 0.0543     | 97        | -3193          | <b>0.011</b>   |
| pre-op (t0) - 4-6 wk post-op (t2)                 | 0.173           | 0.0562     | 97        | 3085           | <b>0.016</b>   |
| pre-op (t0) - 12 wk post-op (t3)                  | 0.327           | 0.0538     | 97        | 6065           | <.001          |
| d7 post-op (t1) - 4-6 wk post-op (t2)             | 0.347           | 0.0545     | 97        | 6369           | <.001          |
| d7 post-op (t1) - 12 wk post-op (t3)              | 0.500           | 0.0548     | 97        | 9132           | <.001          |
| 4-6 wk post-op (t2) - 12 wk post-op (t3)          | 0.153           | 0.0444     | 97        | 3451           | <b>0.005</b>   |
| P value adjustment: bonferroni method for 6 tests |                 |            |           |                |                |
| <b>Pre-frail</b>                                  |                 |            |           |                |                |
| <b>Effect</b>                                     | <b>df</b>       | <b>MSE</b> | <b>F</b>  | <b>ges</b>     | <b>p.value</b> |
| Time                                              | 2.43,<br>116.77 | 0.15       | 21.34 *** | .207           | <.001          |
| <b>contrast</b>                                   | <b>estimate</b> | <b>SE</b>  | <b>df</b> | <b>t.ratio</b> | <b>p.value</b> |
| pre-op (t0) - d7 post-op (t1)                     | -0.4286         | 0.0772     | 48        | -5555          | <.001          |
| pre-op (t0) - 4-6 wk post-op (t2)                 | -0.0204         | 0.0743     | 48        | -0.275         | 1000           |
| pre-op (t0) - 12 wk post-op (t3)                  | 0.0816          | 0.0641     | 48        | 1273           | 1000           |
| d7 post-op (t1) - 4-6 wk post-op (t2)             | 0.4082          | 0.0767     | 48        | 5322           | <.001          |
| d7 post-op (t1) - 12 wk post-op (t3)              | 0.5102          | 0.0778     | 48        | 6556           | <.001          |
| 4-6 wk post-op (t2) - 12 wk post-op (t3)          | 0.1020          | 0.0437     | 48        | 2335           | 0.143          |
| P value adjustment: bonferroni method for 6 tests |                 |            |           |                |                |
| <b>Frail</b>                                      |                 |            |           |                |                |
| <b>Effect</b>                                     | <b>df</b>       | <b>MSE</b> | <b>F</b>  | <b>ges</b>     | <b>p.value</b> |
| Time                                              | 2.76,<br>132.40 | 0.14       | 25.98     | .249           | <.001          |
| <b>Contrast</b>                                   | <b>estimate</b> | <b>SE</b>  | <b>df</b> | <b>t.ratio</b> | <b>p.value</b> |
| pre-op (t0) - d7 post-op (t1)                     | 0.0816          | 0.0571     | 48        | 1.429          | 0.957          |
| pre-op (t0) - 4-6 wk post-op (t2)                 | 0.3673          | 0.0754     | 48        | 4.869          | <b>0.001</b>   |
| pre-op (t0) - 12 wk post-op (t3)                  | 0.5714          | 0.0714     | 48        | 8.000          | <.001          |
| d7 post-op (t1) - 4-6 wk post-op (t2)             | 0.2857          | 0.0772     | 48        | 3.703          | <b>0.003</b>   |
| d7 post-op (t1) - 12 wk post-op (t3)              | 0.4898          | 0.0778     | 48        | 6.294          | <.001          |
| 4-6 wk post-op (t2) - 12 wk post-op (t3)          | 0.2041          | 0.0770     | 48        | 2.649          | 0.065          |
| P value adjustment: bonferroni method for 6 tests |                 |            |           |                |                |

**Supplementary Table 4** rmANOVA Subscore Weakness (grip strength)

| <b>Total sample</b> |                 |            |          |            |                |
|---------------------|-----------------|------------|----------|------------|----------------|
| <b>Effect</b>       | <b>df</b>       | <b>MSE</b> | <b>F</b> | <b>ges</b> | <b>p.value</b> |
| Time                | 2.80,<br>271.66 | 0.07       | 0.26     | <.001      | 0.840          |
| <b>Pre-frail</b>    |                 |            |          |            |                |
| <b>Effect</b>       | <b>df</b>       | <b>MSE</b> | <b>F</b> | <b>ges</b> | <b>p.value</b> |
| Time                | 2.07, 99.28     | 0.06       | 1.41     | .005       | 0.248          |
| <b>Frail</b>        |                 |            |          |            |                |
| <b>Effect</b>       | <b>df</b>       | <b>MSE</b> | <b>F</b> | <b>ges</b> | <b>p.value</b> |
| Time                | 2.82,<br>135.48 | 0.09       | 0.06     | <.001      | .978           |

**Supplementary Table 5** rmANOVA Subscore Low physical activity

| <b>Total sample</b>                               |                 |            |           |                |                |
|---------------------------------------------------|-----------------|------------|-----------|----------------|----------------|
| <b>Effect</b>                                     | <b>df</b>       | <b>MSE</b> | <b>F</b>  | <b>ges</b>     | <b>p.value</b> |
| Time                                              | 2.71,<br>262.45 | 0.19       | 38.52     | .201           | <.001          |
| <b>contrast</b>                                   | <b>estimate</b> | <b>SE</b>  | <b>df</b> | <b>t.ratio</b> | <b>p.value</b> |
| pre-op (t0) - d7 post-op (t1)                     | 0.255           | 0.0685     | 97        | 3723           | <b>0.002</b>   |
| pre-op (t0) - 4-6 wk post-op (t2)                 | 0.469           | 0.0636     | 97        | 7384           | <.001          |
| pre-op (t0) - 12 wk post-op (t3)                  | 0.582           | 0.0541     | 97        | 10746          | <.001          |
| d7 post-op (t1) - 4-6 wk post-op (t2)             | 0.214           | 0.0585     | 97        | 3665           | <b>0.002</b>   |
| d7 post-op (t1) - 12 wk post-op (t3)              | 0.327           | 0.0558     | 97        | 5856           | <.001          |
| 4-6 wk post-op (t2) - 12 wk post-op (t3)          | 0.112           | 0.0479     | 97        | 2346           | 0.126          |
| P value adjustment: bonferroni method for 6 tests |                 |            |           |                |                |
| <b>Pre-frail</b>                                  |                 |            |           |                |                |
| <b>Effect</b>                                     | <b>df</b>       | <b>MSE</b> | <b>F</b>  | <b>ges</b>     | <b>p.value</b> |
| Time                                              | 2.53,<br>121.60 | 0.22       | 14.14     | .177           | <.001          |
| <b>contrast</b>                                   | <b>estimate</b> | <b>SE</b>  | <b>df</b> | <b>t.ratio</b> | <b>p.value</b> |
| pre-op (t0) - d7 post-op (t1)                     | 0.000           | 0.1010     | 48        | 0.000          | 1000           |
| pre-op (t0) - 4-6 wk post-op (t2)                 | 0.327           | 0.1026     | 48        | 3181           | <b>0.015</b>   |
| pre-op (t0) - 12 wk post-op (t3)                  | 0.449           | 0.0828     | 48        | 5423           | <.001          |
| d7 post-op (t1) - 4-6 wk post-op (t2)             | 0.327           | 0.0845     | 48        | 3866           | <b>0.002</b>   |
| d7 post-op (t1) - 12 wk post-op (t3)              | 0.449           | 0.0718     | 48        | 6254           | <.0001         |
| 4-6 wk post-op (t2) - 12 wk post-op (t3)          | 0.122           | 0.0692     | 48        | 1769           | 0.499          |
| P value adjustment: bonferroni method for 6 tests |                 |            |           |                |                |
| <b>Frail</b>                                      |                 |            |           |                |                |
| <b>Effect</b>                                     | <b>df</b>       | <b>MSE</b> | <b>F</b>  | <b>ges</b>     | <b>p.value</b> |
| Time                                              | 2.81,<br>135.09 | 0.14       | 36.98     | .302           | <.001          |
| <b>contrast</b>                                   | <b>estimate</b> | <b>SE</b>  | <b>df</b> | <b>t.ratio</b> | <b>p.value</b> |
| pre-op (t0) - d7 post-op (t1)                     | 0.510           | 0.0778     | 48        | 6556           | <.001          |
| pre-op (t0) - 4-6 wk post-op (t2)                 | 0.612           | 0.0703     | 48        | 8706           | <.001          |
| pre-op (t0) - 12 wk post-op (t3)                  | 0.714           | 0.0652     | 48        | 10954          | <.001          |
| d7 post-op (t1) - 4-6 wk post-op (t2)             | 0.102           | 0.0785     | 48        | 1300           | 1000           |
| d7 post-op (t1) - 12 wk post-op (t3)              | 0.204           | 0.0824     | 48        | 2478           | 0.101          |
| 4-6 wk post-op (t2) - 12 wk post-op (t3)          | 0.102           | 0.0668     | 48        | 1528           | 0.799          |
| P value adjustment: bonferroni method for 6 tests |                 |            |           |                |                |

df, degrees of freedom; MSE, mean squared error; SE, standard error; ges, generalised eta squared
