# Supplementary material for: The impact of primary total hip and knee replacement on frailty: an observational prospective analysis
Source: PubMed Central journal article supplement (PMC10799496; doi:10.1186/s12891-024-07210-w), 2024-01-20
Supplement: 12891_2024_7210_MOESM2_ESM.pdf [file 12891_2024_7210_MOESM2_ESM.pdf]

## Additional file 2

### Supplementary file contents:

These further analyses included repeated measures ANOVA for the THA and TKA subgroups. These were further subdivided into pre-frail and frail.

**Supplementary Table 1** Results of the rmANOVA subanalysis of the THA group for the four measurement points (t0-t3) of the Fried Frailty Phenotype

| <b>Hip patients</b>                               |                 |            |           |                |                |
|---------------------------------------------------|-----------------|------------|-----------|----------------|----------------|
| <b>Pre-frail</b>                                  |                 |            |           |                |                |
| <b>Effect</b>                                     | <b>df</b>       | <b>MSE</b> | <b>F</b>  | <b>ges</b>     | <b>p.value</b> |
| Time                                              | 2.04, 50.97     | 1.20       | 14.96     | .211           | <.001          |
| <b>contrast</b>                                   | <b>estimate</b> | <b>SE</b>  | <b>df</b> | <b>t.ratio</b> | <b>p.value</b> |
| pre-op (t0) - d7 post-op (t1)                     | -0.577          | 0.315      | 25        | -1.834         | 0.472          |
| pre-op (t0) - 4-6 wk post-op (t2)                 | 0.462           | 0.289      | 25        | 1.594          | 0.740          |
| pre-op (t0) - 12 wk post-op (t3)                  | 1.038           | 0.180      | 25        | 5.783          | <.001          |
| d7 post-op (t1) - 4-6 wk post-op (t2)             | 1.038           | 0.204      | 25        | 5.099          | <.001          |
| d7 post-op (t1) - 12 wk post-op (t3)              | 1.615           | 0.272      | 25        | 5.935          | <.001          |
| 4-6 wk post-op (t2) - 12 wk post-op (t3)          | 0.577           | 0.216      | 25        | 2.670          | 0.079          |
| P value adjustment: bonferroni method for 6 tests |                 |            |           |                |                |
| <b>Frail</b>                                      |                 |            |           |                |                |
| <b>Effect</b>                                     | <b>df</b>       | <b>MSE</b> | <b>F</b>  | <b>ges</b>     | <b>p.value</b> |
| Time                                              | 2.43, 89.83     | 0.94       | 46.08     | .337           | <.001          |
| <b>contrast</b>                                   | <b>estimate</b> | <b>SE</b>  | <b>df</b> | <b>t.ratio</b> | <b>p.value</b> |
| pre-op (t0) - d7 post-op (t1)                     | 1.158           | 0.212      | 37        | 5.468          | <.001          |
| pre-op (t0) - 4-6 wk post-op (t2)                 | 1.658           | 0.186      | 37        | 8.922          | <.001          |
| pre-op (t0) - 12 wk post-op (t3)                  | 2.263           | 0.167      | 37        | 13.525         | <.001          |
| d7 post-op (t1) - 4-6 wk post-op (t2)             | 0.500           | 0.232      | 37        | 2.158          | 0.225          |
| d7 post-op (t1) - 12 wk post-op (t3)              | 1.105           | 0.238      | 37        | 4.646          | <.001          |
| 4-6 wk post-op (t2) - 12 wk post-op (t3)          | 0.605           | 0.149      | 37        | 4.071          | 0.001          |
| P value adjustment: bonferroni method for 6 tests |                 |            |           |                |                |

**Supplementary Table 2** Results of the rmANOVA subanalysis of the TKA group for the four measurement points (t0-t3) of the Fried Frailty Phenotype

| <b>Knee patients</b>                              |                 |            |           |                |                |
|---------------------------------------------------|-----------------|------------|-----------|----------------|----------------|
| <b>Pre-frail</b>                                  |                 |            |           |                |                |
| <b>Effect</b>                                     | <b>df</b>       | <b>MSE</b> | <b>F</b>  | <b>ges</b>     | <b>p.value</b> |
| Time                                              | 2.56, 56.31     | 0.72       | 11.98     | .269           | <0.001         |
| <b>contrast</b>                                   | <b>estimate</b> | <b>SE</b>  | <b>df</b> | <b>t.ratio</b> | <b>p.value</b> |
| pre-op (t0) - d7 post-op (t1)                     | -0.044          | 0.263      | 22        | -0.165         | 1.000          |
| pre-op (t0) - 4-6 wk post-op (t2)                 | 0.913           | 0.208      | 22        | 4.396          | <b>0.001</b>   |
| pre-op (t0) - 12 wk post-op (t3)                  | 1.000           | 0.209      | 22        | 4.796          | <b>0.001</b>   |
| d7 post-op (t1) - 4-6 wk post-op (t2)             | 0.957           | 0.231      | 22        | 4.144          | <b>0.003</b>   |
| d7 post-op (t1) - 12 wk post-op (t3)              | 1.044           | 0.277      | 22        | 3.761          | <b>0.007</b>   |
| 4-6 wk post-op (t2) - 12 wk post-op (t3)          | 0.087           | 0.188      | 22        | 0.463          | 1.000          |
| P value adjustment: bonferroni method for 6 tests |                 |            |           |                |                |
| <b>Frail</b>                                      |                 |            |           |                |                |
| <b>Effect</b>                                     | <b>df</b>       | <b>MSE</b> | <b>F</b>  | <b>ges</b>     | <b>p.value</b> |
| Time                                              | 2.55, 28.00     | 1.27       | 6.26      | .184           | .003           |
| <b>contrast</b>                                   | <b>estimate</b> | <b>SE</b>  | <b>df</b> | <b>t.ratio</b> | <b>p.value</b> |
| pre-op (t0) - d7 post-op (t1)                     | 0.667           | 0.432      | 11        | 1.542          | 0.908          |
| pre-op (t0) - 4-6 wk post-op (t2)                 | 1.500           | 0.469      | 11        | 3.200          | 0.051          |
| pre-op (t0) - 12 wk post-op (t3)                  | 1.583           | 0.499      | 11        | 3.171          | 0.053          |
| d7 post-op (t1) - 4-6 wk post-op (t2)             | 0.833           | 0.322      | 11        | 2.590          | 0.151          |
| d7 post-op (t1) - 12 wk post-op (t3)              | 0.917           | 0.434      | 11        | 2.110          | 0.352          |
| 4-6 wk post-op (t2) - 12 wk post-op (t3)          | 0.083           | 0.358      | 11        | 0.233          | 1.000          |
| P value adjustment: bonferroni method for 6 tests |                 |            |           |                |                |
